1 **PLK4 is a microtubule-associated protein that self assembles promoting *de novo* MTOC**  
2 **formation**  
3

4 Susana Montenegro Gouveia <sup>\*#1</sup>, Sihem Zitouni <sup>\*1</sup>, Dong Kong <sup>2</sup>, Paulo Duarte <sup>1</sup>, Beatriz Ferreira Gomes <sup>3</sup>, Ana  
5 Laura Sousa <sup>1</sup>, Erin M. Tranfield <sup>1</sup>, Anthony Hyman <sup>3</sup>, Jadranka Loncarek <sup>2</sup> and Monica Bettencourt-Dias <sup>#1</sup>

6 <sup>1</sup> Instituto Gulbenkian de Ciência, Rua da Quinta Grande 6, Oeiras, 2780-156, Portugal

7 <sup>2</sup> Laboratory of Protein Dynamics and Signaling, National Institutes of Health/Center for Cancer Research/National  
8 Cancer Institute-Frederick, Frederick, MD

9 <sup>3</sup> Max Planck Institute of Molecular Biology and Genetics, Pfotenhauerstrasse 108  
10 01307 Dresden, Germany

11  
12  
13 \* Co-first author

14  
15  
16 # corresponding authors:  
17 [susanamgouveia@gmail.com](mailto:susanamgouveia@gmail.com)  
18 [mdias@igc.gulbenkian.pt](mailto:mdias@igc.gulbenkian.pt)  
19

20 **Keywords:**

21 PLK4, MTOCs, *in vitro* reconstitution, microtubule nucleation, PCM, centrosomes, *de novo*,  
22 supramolecular assemblies.

23

24 **Summary statement**

25  
26 PLK4 binds to microtubules and self assembles into supramolecular assemblies that recruit tubulin and  
27 trigger *de novo* MTOC formation in *Xenopus laevis* extracts.

28 **Abstract**

29 The centrosome is an important microtubule-organizing center (MTOCs) in animal cells and it consists of  
30 two barrel-shaped structures (centrioles), surrounded by the pericentriolar material (PCM), which  
31 nucleates microtubules. PCM components form condensates, supramolecular assemblies that  
32 concentrate microtubule nucleators. Centrosomes can form close to an existing structure (canonical  
33 duplication) or *de novo*. How centrosomes form *de novo* is not known. PLK4 is a master driver of  
34 centrosome biogenesis, which is critical to recruit several centriole components. Here, we investigate the  
35 beginning of centrosome biogenesis, taking advantage of *Xenopus* egg extracts, where we and others  
36 have shown that PLK4 can induce *de novo* MTOC formation (Eckerdt et al., 2011; Zitouni et al., 2016).  
37 Surprisingly, we observe that *in vitro*, PLK4 can self-assemble into supramolecular assemblies that recruit  
38  $\alpha/\beta$ -tubulin. In *Xenopus* extracts, PLK4 supramolecular assemblies additionally recruit the PLK4 substrate  
39 STIL and the microtubule nucleator,  $\gamma$ -tubulin, and form acentriolar MTOCs *de novo*. The assembly of  
40 these robust microtubule asters is independent of dynein, similarly to centrosomes. We suggest a new  
41 mechanism of action for PLK4, where it forms a self-organizing catalytic scaffold that recruits centriole  
42 components, PCM factors and  $\alpha/\beta$ -tubulin, leading to MTOC formation.

## 43 **Introduction**

44 Centrosomes are important microtubule organizing centres (MTOCs) in animal cells, being involved in a  
45 variety of cellular and developmental processes, including cell motility, division and polarity (Sanchez  
46 and Feldman, 2017). Centrosomes are composed of a core structure, a pair of centrioles, surrounded by  
47 a protein-rich pericentriolar material (PCM), which nucleates and anchors a microtubule (MT) array  
48 within the cell (Paz and Luders, 2017). PCM proteins can also associate with other cellular structures to  
49 assemble non-centrosomal MTOCs (Sanchez and Feldman, 2017), the assembly of which is less  
50 characterised (Sanchez and Feldman, 2017).

51 Critical for centrosome assembly is PLK4, a serine-threonine kinase, member of the polo-like kinase  
52 family, which triggers procentriole formation close to a centriole that already exists, or induces centriole  
53 *de novo* formation when centrioles are absent (Bettencourt-Dias et al., 2005; Habedanck et al., 2005;  
54 Rodrigues-Martins et al., 2007). Recently, it was demonstrated that PLK4 promotes MT nucleation in the  
55 acentriolar mouse embryo, being essential for spindle assembly, suggesting it can also contribute to  
56 acentriolar MTOC formation (Bury et al., 2017; Coelho et al., 2013).

57 How PLK4 protein drives *de novo* MTOC formation is not understood. To study the role of PLK4 in  
58 acentriolar systems, we used both *in vitro* systems and acentriolar *Xenopus* extracts, where it had been  
59 previously observed that PLK4 is sufficient to generate *de novo* MTOCs (Eckerdt et al., 2011; Zitouni et  
60 al., 2016). We show that *in vitro* PLK4 self-assembles into supramolecular assemblies that recruit tubulin.  
61 In *Xenopus* extracts, PLK4 supramolecular assemblies recruit STIL,  $\gamma$ -tubulin and tubulin, forming  
62 acentrosomal MTOCs *de novo*. Thus, PLK4 plays an important role in forming both centriole-containing  
63 and acentriolar MTOCs.

64

## 65 **Results and Discussion**

### 66 **PLK4 self-assembles into supramolecular assemblies that concentrate soluble tubulin *in vitro***

67 We wished to investigate how PLK4 drives *de novo* MTOC formation. Recently, Woodruff and colleagues  
68 used a minimal set of *C. elegans* proteins to reconstitute a functional MTOC *in vitro*. They observed that  
69 the PCM protein, SPD-5, self-assembles into spherical scaffolds named condensates, which together with  
70 homologs of XMAP215 and TPX2 allowed the formation of acentrosomal MTOCs (Woodruff et al., 2017).  
71 SPD-5 condensates are formed in macro-molecular crowding environments containing polyethylene  
72 glycol (PEG) and once formed can concentrate other proteins (Woodruff et al., 2017).

73 We wished to also explore a minimal system to study PLK4 function. We expressed GFP tagged *Xenopus*  
74 PLK4 in the baculovirus system. We were surprised to observe that purified GFP-PLK4, but not GFP alone,  
75 self-assembles into sphere-like structures similar to the spherical SPD-5 condensates, in this case even in  
76 the absence of PEG (Fig. 1A, 1B) (Woodruff et al., 2017). It is possible that PLK4 supramolecular  
77 assemblies form through multimerization, as PLK4 has the ability to dimerise in different regions of the  
78 protein (Jana et al., 2014).

79 We then asked whether PLK4 on its own would form an MTOC, and added  $\alpha/\beta$ -tubulin to the assay.  
80 Using confocal microscopy, we observed that PLK4 supramolecular assemblies are able to selectively  
81 recruit  $\alpha/\beta$ -tubulin (Fig. 1B). Although we were unable to observe MT nucleation *in vitro*, we were  
82 intrigued by the fact that  $\alpha/\beta$ -tubulin coats PLK4 supramolecular assemblies without the need for MT  
83 nucleators (Fig. 1B).

84 PLK4's ability to form centrioles in cells and MTOCs in *Xenopus* extract requires its kinase activity  
85 (Rodrigues-Martins et al., 2007; Zitouni et al., 2016). We asked whether supramolecular assembly  
86 requires PLK4 kinase activity, using recombinant GFP-PLK4<sup>AS</sup> (L89A/H188Y). PLK4<sup>AS</sup> can specifically fit  
87 bulky ATP analogues, making it sensitive to ATP-analogue inhibitors such as NAPP1, while having a  
88 comparable kinase activity to PLK4<sup>WT</sup> (Bishop et al., 2000; Zitouni et al., 2016). We show that  
89 recombinant GFP-PLK4<sup>AS</sup> has the ability to self-assemble into supramolecular assemblies similar to GFP-  
90 PLK4<sup>WT</sup> (Fig. 1C and 1D). However, in the presence of the inhibitor NAPP1, the formation of  
91 supramolecular assemblies is severely impaired, as observed by confocal microscopy (Fig. 1C) and  
92 electron microscopy (Fig. 1D and 1E). Instead of robust spherical structures, PLK4 aggregates show an  
93 amorphous network with no regular shape or higher-order structure (Fig. 1D). We observed the same  
94 effect when PLK4 was treated with lambda phosphatase, which renders it inactive, suggesting that the  
95 catalytic activity of PLK4 is required to promote the formation of supramolecular assemblies *in vitro* (Fig.  
96 S1B) (Lopes et al., 2015).

### 97 **PLK4 binds microtubules *in vitro***

98 Given that PLK4 supramolecular assemblies can recruit tubulin, we asked whether PLK4 has affinity for  
99 MTs and could promote MT stabilization. We observed by confocal microscopy that GFP-PLK4  
100 supramolecular assemblies associate with stable MT seeds *in vitro* when they are incubated together  
101 (Fig. 2A). The great majority of PLK4 supramolecular assemblies are associated to MTs (~95.4%) (Fig. 2B).  
102 We then asked if PLK4 binds directly to MTs. We performed MT pelleting assays, where PLK4 and MTs  
103 are ultracentrifuged together. Polymerized MT will pellet (P) together with bound protein whereas the

104 unbound fraction will remain suspended in solution (S). We observed that purified PLK4 is able to co-  
105 pellet with the MT fraction *in vitro* (Fig. 2C). To calculate the binding dissociation constant (Kd), we  
106 performed pelleting assays with a constant concentration of PLK4 (0.7  $\mu\text{M}$ ) and increasing  
107 concentrations of MTs (0 to 4  $\mu\text{M}$ ). Reciprocally, we performed the same assay using a constant amount  
108 of MTs (10  $\mu\text{M}$ ) and increasing amounts of PLK4 (0 to 4  $\mu\text{M}$ ) until the saturation point, (Fig. 2C). We  
109 further plotted PLK4 bound to MTs versus MT concentration, from three independent experiments. The  
110 calculated Kd is the concentration of MTs that is required to sediment half of PLK4 (Fig 2D). These data  
111 strongly indicate that PLK4 is a MT-associated protein (MAP) that binds MTs directly with high affinity  
112 (Kd= 0.62  $\mu\text{M} \pm 0.071$ ). In addition, PLK4 kinase activity does not seem to be required for MT binding  
113 since the inhibited recombinant GFP-PLK4<sup>AS</sup> still binds MTs (Fig 1D). Finally, we observed that PLK4 led to  
114 an increase in the formation of MT bundles in a concentration-dependent manner (Fig. 2E and 2F). As  
115 MT bundles are known to stabilize MTs dynamic, perhaps PLK4 promotes MT stabilization (Brandt and  
116 Lee, 1994; Umeyama et al., 1993).

117  
118 **PLK4 supramolecular assemblies form *de novo* MTOCs in *Xenopus* extracts that mimic centrosomes *in***  
119 ***vivo***

120 We asked whether PLK4 supramolecular assemblies could promote MT nucleation when exposed to the  
121 right environment. It was previously shown that PLK4 induces *de novo* MTOC formation after exit from  
122 M-phase in *Xenopus* egg extracts (Eckerdt et al., 2011; Zitouni et al., 2016). We observed that PLK4  
123 supramolecular assemblies, after being formed *in vitro*, are able to nucleate MTs if incubated with  
124 *Xenopus* egg extracts, suggesting that PLK4 supramolecular assemblies act as a scaffold that forms an  
125 active MTOC (Fig. 3A).

126 Next we investigated whether GFP-PLK4 forms supramolecular assemblies in extracts. Supramolecular  
127 assemblies were formed in the extract and were variable in size (Fig. 3C), with sizes similar to the size of  
128 the centrosome (300 to 1000 nm, with an average size of  $\sim 650$  nm). We used rhodamine-tubulin and  
129 EB3-mCherry to visualize the nucleation driven by GFP-PLK4 in extracts (Fig. 3B, Movie 1). These MTOCs  
130 contain GFP-PLK4 at their core, showing a ring-like-structure, surrounded by tubulin, as observed by  
131 confocal microscopy. This is similar to what we observed *in vitro*, suggesting we are looking at the same  
132 entity both *in vitro* and in the extract.

133 Microtubule asters can be formed in two different ways: motor based self-assembly of MT minus-end  
134 bound material (acentrosomal MTOCs) (Compton, 1998; Mitchison, 1992; Sanchez and Feldman, 2017),  
135 where motor proteins, such as dynein, play a crucial role in MTOC formation (Gaglio et al., 1997; Gaglio

136 et al., 1996); or alternatively in a motor-independent manner, relying on nucleation and anchoring of  
137 MTs to a pre-existing structure such as the centrosome. We thus investigated whether PLK4 MTOCs  
138 depend or not on dynein. Centrioles and DMSO asters were used as controls. As expected, while DMSO  
139 asters are destroyed in the presence of the dynein inhibitors, vanadate and ciliobrevin, centrioles  
140 remained capable of nucleating MTs (Fig. S2). In the case of PLK4 driven MTOCs, we observed they could  
141 form in a dynein-independent manner (Fig. 3D and S2), showing their independence from motors. This  
142 suggests PLK4-driven MTOCs form in a similar manner to centrosomes.

143 We then investigated whether there were centrioles at the center of the aster, investigating the  
144 ultrastructure of PLK4-driven MTOCs, using correlative light-electron microscopy (CLEM) (Fig. 3E).  
145 Unexpectedly, we observed no centrioles. Instead, we observed sphere like structures; these structures  
146 are correlated with the ring structure we observed by confocal microscopy and are the centre of PLK4  
147 MTOCs. Most of the structures were hollow (Fig. 3F), with some exceptions; their size was on average  
148 ~700 nm (Fig. 3E, 3F and 3G). We conclude that PLK4 supramolecular assemblies localize at the centre of  
149 the PLK4-induced MTOCs and have the ability to nucleate MTs, similar to bona-fide centrosomes.

#### 150 **PLK4 supramolecular assemblies recruit STIL and $\gamma$ -tubulin in *Xenopus* extracts, leading to centrosomal** 151 **MT nucleation**

152 To further characterize PLK4 supramolecular assemblies, and understand their ability to form an MTOC,  
153 we asked whether these supramolecular assemblies also recruit other components (in addition to  $\alpha/\beta$ -  
154 tubulin), in particular PLK4 substrates and MT nucleators. First, we used 3D-SIM to characterize at super-  
155 resolution level PLK4-driven MTOCs in *Xenopus* egg extracts. We could observe the GFP-PLK4 structure  
156 similar to a ring in its centre in 2D (Fig. 4A) and to a sphere/condensate after 3D reconstruction (Fig. 4B  
157 and Movie 2 and 3).

158 We investigated the presence of STIL and  $\gamma$ -tubulin in PLK4 supramolecular assemblies. STIL is a well-  
159 known substrate of PLK4 and the formation of the complex PLK4-STIL is the first event that triggers  
160 centriole biogenesis (Loncarek and Bettencourt-Dias, 2017).  $\gamma$ -tubulin is a highly conserved protein, the  
161 major known MT nucleator, which is associated to all MTOCs studied so far (O'Toole et al., 2012; Teixido-  
162 Travesa et al., 2012). Most  $\gamma$ -tubulin in animal cells appears to exist as  $\gamma$ -TuRC that nucleates MTs (Wiese  
163 and Zheng, 1999). Interestingly, GCP6, one of the  $\gamma$ -TuRC members, is a PLK4 substrate (Bahtz et al.,  
164 2012; Martin et al., 2014).

165 We investigated the localization of STIL and  $\gamma$ -tubulin using immunofluorescence on fixed PLK4 MTOCs.  
166 We found that both STIL and  $\gamma$ -tubulin co-localize with PLK4 supramolecular assemblies in a spatially

167 ordered manner (Fig. 4C and D). We observed PLK4 supramolecular assemblies in the centre, closely  
168 followed by a layer of STIL and then by  $\gamma$ -tubulin (Fig. 4D and Movie 4). The intensities of the three  
169 signals plotted together give a good insight of the close spatial relationship between the three molecules  
170 (Fig. 4E). We were unable to detect other centrosome proteins, due to the lack of specific antibodies  
171 against the *Xenopus* proteins. Importantly, depletion of STIL, prevents the formation of PLK4-induced  
172 MTOCs in extracts, suggesting that the same pathway is involved in triggering the formation of centrioles  
173 and acentriolar MTOCs (Fig. 4F and 4G) (Zitouni et al., 2016).

174 In summary, we have shown that *in vitro*, PLK4 self-assembles into supramolecular assemblies. When  
175 these supramolecular assemblies are added to extracts in interphase they can recruit STIL,  $\gamma$ -tubulin and  
176  $\alpha/\beta$  tubulin, forming a layered MTOC, similar to a centrosome. PLK4's kinase activity is critical to form  
177 supramolecular assemblies and acentrosomal MTOCs (Fig. 1C, D, E and F), as well as centrioles (Moyer et  
178 al., 2015). Moreover, STIL is required for both PLK4-mediated centrosomal and acentrosomal MTOC  
179 formation, suggesting that both pathways use similar mechanisms. It is thus possible that even upon the  
180 presence of centrioles, PLK4 could promote the formation of supramolecular assemblies that  
181 concentrate components that are critical to form centrioles: including STIL,  $\gamma$ -tubulin and  $\alpha/\beta$  tubulin. We  
182 have shown that both STIL and  $\alpha/\beta$  tubulin bind PLK4. Since GCP6 (a known substrate of PLK4) is required  
183 for the recruitment of  $\gamma$ -TuRC to the centrosome, perhaps it can recruit  $\gamma$ -TuRC to PLK4-supramolecular  
184 assemblies (Bahtz et al., 2012; Oriolo et al., 2007; Teixido-Travesa et al., 2012). Additionally, CPAP, a  
185 binding partner of STIL known to be involved in MT stabilization, could indirectly enhance MT nucleation  
186 from PLK4 driven MTOCs (Sharma et al., 2016). PLK4 itself could also have a role in promoting further  
187 nucleation as it was recently proposed that MT stabilizers can promote MT nucleation in cells (Roostalu  
188 and Surrey, 2017). The authors proposed that MT stabilizers control the nucleation efficiency by  
189 stabilizing the MT centre or "nucleus", either by providing a template for assembly or by promoting  
190 longitudinal or lateral tubulin-tubulin interactions.

191 Furthermore, it is also possible that the ability of PLK4 to bind MTs and to recruit STIL and  $\gamma$ -tubulin  
192 further promotes MT nucleation, even when centrosomes or other MTOCs are already present. To  
193 address this hypothesis, we used GFP-centrin purified centrioles from HeLa cells and incubated them  
194 with *Xenopus* egg extract. Shortly after addition to the interphasic *Xenopus* egg extract, the purified  
195 centrioles were able to recruit PCM components and nucleate MTs. However, when we added GFP-PLK4,  
196 we observed a very robust increase in MT nucleation capacity, MT elongation and a decrease in MT  
197 dynamics, suggesting their stabilization (Fig. 4H, 4I and Movie 5 and 6). We also observed the same  
198 effect in *Xenopus* egg extracts upon M-phase release (Fig. S3). These observations are very similar to the

199 ones from Popov and colleagues with XMAP215, a processed MT polymerase that plays an important  
200 role in MT nucleation in addition to  $\gamma$ -tubulin (Popov et al., 2002). Altogether, our observations suggest a  
201 mechanism by which PLK4 promote MT nucleation in centrosomal and acentrosomal systems.  
202 PLK4 forms supramolecular assemblies that recruit several important components in MT-nucleation,  
203 including gamma and  $\alpha\beta$  tubulin. We suggest this lowers the critical concentration of spontaneous MT  
204 nucleation leading to MTOC formation (Fig. 4J). Furthermore, the PLK4 supramolecular assemblies  
205 exhibit a layered organization, as it was shown to exist in the interphasic centrosome in animal cells  
206 (Lawo et al., 2012). The ability to mimic the layered centrosome in vitro opens up new ways of  
207 understanding PCM assembly. Future work aims at understanding how PLK4 supramolecular assemblies  
208 are formed, whether they form condensates, such as SPD5, and whether they are formed at the site of  
209 centriole birth, on mother centrioles.



210 **Figure legends**

211 **Fig. 1. PLK4 self-assembles into supramolecular assemblies that concentrate tubulin *in vitro***  
212 **and is dependent on its kinase activity.**

213 (A) Representative images of GFP-PLK4 supramolecular assemblies formed at different concentrations of  
214 NaCl. (B) Representative confocal images of GFP-PLK4 condensate formation in the absence or presence  
215 of rhodamine-labelled tubulin (500 nM). GFP was used as a control. Scale bars: 5  $\mu\text{m}$ ; Insets: 2  $\mu\text{m}$ . (C)  
216 Confocal images representing GFP-PLK4<sup>AS</sup> in the absence or presence of NAPP1. Scale bars: 5  $\mu\text{m}$ . Note  
217 that in presence of NAPP1, GFP-PLK4 forms disorganized structures. (D) Electron microscopy (EM) images  
218 of GFP-PLK4<sup>AS</sup> in presence or absence of NAPP1. Scale bars: 100 nm. (E) Quantification of percentage of  
219 supramolecular assemblies versus aggregates obtained from EM data. Three independent experiments  
220 were counted. (F) Scheme illustrating the results.

221 **Fig. 2. PLK4 is a microtubule-associated protein that promotes microtubule bundling *in vitro*.**

222 (A) Confocal images of Taxol-stabilized MTs alone (rhodamine-labeled tubulin, red), recombinant purified  
223 GFP-PLK4 alone (green) and the mixture of both. Scale bar: 5  $\mu\text{m}$ ; Inset: 2  $\mu\text{m}$ . (B) Quantification of PLK4  
224 supramolecular assemblies associated to MTs compared to free PLK4 supramolecular assemblies in the  
225 background. (N=3, n=100 spot/conditions). (C) MT-pelleting assays. The two assays are showing a  
226 constant concentration of PLK4 (0.7  $\mu\text{M}$ ) mixed and incubated with different concentrations of MTs (0 to  
227 4  $\mu\text{M}$ ) or an increasing amounts of GFP-PLK4 (0 to 4  $\mu\text{M}$ ) in presence of constant concentration of MTs  
228 (10  $\mu\text{M}$ ). The western blot is showing supernatant (S) and pellet (P) for each condition. (D) Quantitative  
229 analysis of the binding properties between PLK4 and MTs. Note that the dissociation constant (Kd) for  
230 PLK4, determined by best fit to the data (red curve), is  $0.62 \pm 0.071 \mu\text{M}$ . Data were collected from three  
231 independent experiments. (E) EM images showing MTs alone or MTs incubated with two different  
232 concentrations of PLK4 (0.1  $\mu\text{M}$  and 1  $\mu\text{M}$ ). Scale bars: 100 nm. (F) Percentage of single or bundled MTs  
233 quantified from the EM data in the presence of PLK4 at 0.1  $\mu\text{M}$  or 1  $\mu\text{M}$ ; MTs alone are used as a control.  
234 Results were scored using 30 images per condition obtained from 3 independent experiments each;  
235 (\*\*P<0.001; \*\*P<0.05).

236 **Fig. 3. PLK4 supramolecular assemblies form *de novo* MTOCs in *Xenopus* extracts that are**  
237 **independent of motor proteins and mimic centrosomes *in vivo*.**

238 (A) GFP-PLK4 was mixed concomitantly with rhodamine-labeled tubulin or supramolecular assemblies  
239 were formed (step I) and then extract released to interphase with calcium containing rhodamine-labeled

240 tubulin were added to these supramolecular assemblies (step II). Note that nucleation was observed  
241 instantly after the addition of the mixture (0-2 min). Scale bars: 5  $\mu\text{m}$ , inset= 2  $\mu\text{m}$ . (B) Confocal images  
242 showing MTOC formation in *Xenopus* MII-calcium-released extracts in presence of recombinant GFP-  
243 PLK4 (green). MTs are visualized using rhodamine-labelled tubulin (red) (upper panel) and EB3-mCherry  
244 (lower panel). MT plus ends visualized by EB3-mCherry point out to the edge of the aster. The insets  
245 show PLK4 as a ring-like structure (see Movie 1). (C) Quantification of the size (nm) of GFP-PLK4 ring-like  
246 structure after 30 min of incubation. GFP-PLK4 rings were measured from 3 independent experiments.  
247 (D) PLK4 asters are independent of dynein. Representative confocal images of PLK4 asters are shown in  
248 the control and in the presence of ciliobrevin (dynein inhibitor). (E) (F) Correlative light/electron  
249 microscopy analysis of PLK4's MTOCs. Plk4-GFP signals were first visualized by fluorescence and DIC, and  
250 then by electron microscopy. A series of 200 nm sections (confocal) and 80 nm EM sections are  
251 presented for two MTOCs (yellow box, MTOC1 and MTOC2) (G) Measurements of the central sections of  
252 MTOC1 (section S5 in F). Values (nm) are presented in the table. Scale bars: 500 nm and 1000 nm.

253 **Fig. 4. PLK4 supramolecular assemblies can recruit STIL and  $\gamma$ -tubulin in *Xenopus* released**  
254 **extracts, and are able to enhance centrosomal MT nucleation.**

255 (A) Representative images of 3D-SIM showing a ring-like structure of PLK4 MTOCs formed in calcium-  
256 released *Xenopus* extracts.  $\alpha$ -tubulin and GFP-PLK4 are presented in red and green, respectively. Scale  
257 bars: 1  $\mu\text{m}$ . (B) 3D-reconstitution of PLK4 asters (see Movie 2 and 3). (C) 3D-SIM images showing the co-  
258 localization of STIL (red),  $\alpha$ -tubulin (magenta), GFP-PLK4 (green) and  $\gamma$ -tubulin (blue). Scale bars: 1  $\mu\text{m}$ .  
259 (D) Representative SIM images showing the localization of GFP-PLK4 (green), STIL (red) and  $\gamma$ -tubulin  
260 (magenta) that co-localize with PLK4 supramolecular assemblies (see Movie 4). (E) Plots showing the  
261 intensity of each scored channels in (D). (F) Confocal images showing PLK4 induced-MTOCs in extracts  
262 (Control (Ctr)) and STIL depleted extract ( $\Delta$ STIL) using tubulin-rhodamine. (G) Western blot showing the  
263 depletion of STIL in the extracts used in (F). (H) PLK4 enhances MT nucleation. Confocal images showing  
264 MT nucleation using purified centrioles labelled with GFP-centrin incubated in *Xenopus* interphasic  
265 extract in the presence or absence of GFP-PLK4 (rhodamine-labelled tubulin (red); centriole and PLK4  
266 (green)). Images were taken after 30 min incubation (see Movie 5 and 6). (I) Quantifications of MTs  
267 length ( $\mu\text{M}$ ) visualized from the centrioles (GFP-centrin MTOCs) in presence or absence of GFP-PLK4.  
268 MTs were measured from 2 independent experiments, where 4 different MTOCs were analyzed. (N is the  
269 total number of MTs measured in presence of GFP-PLK4, N= 225). Scale bar: 5  $\mu\text{M}$ . The statistical data  
270 are presented as  $\pm$  s.d. \*\*\*\*P < 0.0001, (Mann-Whitney U).

## 271 **Materials and Methods**

### 272 **PLK4 protein purification**

273  
274 Full-length *Xenopus* PLK4 gene lacking a stop codon was amplified by PCR and inserted into in-house-  
275 designed baculoviral expression plasmids (pOCC series) to generate the following construct: MBP-  
276 PreScission::PLK4::mEGFP::PreScission-6xHis; The protein was expressed in SF+ insect cells and  
277 harvested 72 hr post infection. Cells were collected, washed, and resuspended in harvest buffer (50 mM  
278 Tris HCl, pH 7.4, 150 mM NaCl, 30 mM imidazole, 1% glycerol) + protease inhibitors (1 mM PMSF, 100  
279 mM AEBSF, 0.08 mM Aprotinin, 5 mM Bestatin, 1.5 mM E-64, 2 mM Leupeptin, 1 mM Pepstatin  
280 A)(Calbiochem) and frozen in liquid nitrogen. The protein was purified using a two-step purification  
281 protocol described in Woodruff, J. B., & Hyman, A. A. (2015)\*. PLK4 clarified lysate was incubated first  
282 with Ni-NTA agarose beads followed by a second incubation with amylose resin. The MBP and 6xHis tags  
283 were cleaved and PLK4 was eluted by overnight incubation with PreScission protease. PLK4 was  
284 concentrated with a 50K Amicon Ultra centrifugal concentrator units (Millipore), aliquoted and flash  
285 frozen in liquid nitrogen. The lysis and final buffer used contained 50 mM Tris-HCl, pH 7.4, 500 mM NaCl,  
286 0.5 mM DTT, 1% glycerol, 0.1% CHAPS. The elution buffer from the Ni-NTA beads contained additional  
287 250 mM imidazole (Woodruff and Hyman, 2015).

### 288 ***In vitro* PLK4 supramolecular assembly**

289 PLK4 supramolecular assemblies were formed by adding purified GFP-PLK4 (1  $\mu$ M) to the condensate  
290 buffer (150 mM NaCl, 25 mM Hepes (pH 7.4) and 1 mM DTT). PLK4 was incubated for 5 min and then  
291 imaged using a spinning disk CSU-X1 (Yokogawa) confocal scan head coupled to a Nikon Eclipse Ti-E and  
292 controlled using MetaMorph 7.5 (Molecular Devices). For tubulin recruitment, tubulin-labeled  
293 rhodamines TRITC (Cytoskeleton) (500 nM) were added to the condensate buffer. We used BRB80 added  
294 to the buffer as a control. The assay using PEG (9%) was performed as described in (Woodruff et al.,  
295 2017).

### 296 **Microtubule pelleting assay**

297 Tubulin was polymerized into MTs stabilized with 20  $\mu$ M taxol in BRB80 buffer (25 mM HEPES, pH 6.8, 2  
298 mM MgCl<sub>2</sub>, 1 mM EGTA, 0.02% Tween 20 (v/v)), and quantified by absorbance measurements at 280 nm.  
299 Various concentrations of MTs were mixed with constant concentrations of PLK4 in BRB80 Buffer or vice-  
300 versa. Samples (final volume=40  $\mu$ l) were allowed to equilibrate at 37°C for 55 minutes, centrifuged in  
301 Airfuge at 90 000 rpm for 30 minutes, and both the supernatant (S) and pellet (P) collected and

302 resuspended in SDS sample buffer, and equal amounts of supernatant and pellet were run on 4–20%  
303 Tris-HCl gradient gels (Bio-Rad). Gels were stained with Coomassie Blue or used for western blot used for  
304 MT and PLK4 detection. Quantification of the relative amounts of PLK4 in supernatants and pellets was  
305 performed using ImageJ (National Institutes of Health, Bethesda, MD). The dissociation constants  
306 measured by MT co-sedimentation represent the average and propagated error from three separate  
307 experiments.

### 308 ***In vitro* PLK4 and microtubule bundling on confocal assay**

309 Taxol-stabilized MTs seeds were incubated with GFP-PLK4 (1  $\mu$ M) for 15 minutes at 37°C and then  
310 mounted in a slide and observed by confocal microscope. Taxol MT seeds were done as previously  
311 described (Honnappa et al., 2009). Briefly, lyophilized 1mg of tubulin (Cytoskeleton) is resuspended in  
312 100  $\mu$ l of BRB80 buffer, GTP and MgCl<sub>2</sub> and incubated for 30 minutes at 37°C. After 20 minutes taxol is  
313 added to a final concentration of 20  $\mu$ M. Stored at room temperature.

### 314 **Electron microscopy negative staining assay**

315 For the electron microscopy assays, GFP-PLK4 or GFP-PLK4<sup>AS</sup> were mixed with purified MTs. Incubation  
316 was performed at 37°C during 30 minutes. To study the effects induced by NAPP1, the inhibitor was  
317 added after the mixing. Samples were adhered to glow discharged copper 150 mesh grids coated with  
318 1% (w/v) formvar (®Agar Scientific) in chloroform (®VWR) and carbon. Following attachment, samples  
319 were rinsed with distilled water and stained with 2% (w/v) uranyl acetate. Electron microscopy images  
320 were acquired on a Hitachi H-7650 operating at 100 keV equipped with a XR41M mid mount AMT digital  
321 camera.

### 322 **Preparation of *Xenopus* Egg Extracts and MTOC Formation Assay**

323 MII-arrested and interphase egg extracts were prepared as previously described (Lorca et al., 2010;  
324 Zitouni et al., 2016). Purified PLK4 (0.675 nM) was added to 20  $\mu$ l of CSF extracts and released into  
325 interphase using calcium (20 mM). MTOCs were analyzed by using rhodamine-labeled porcine tubulin  
326 (Cytoskeleton). The assays using GFP-centrin labeled centrosomes, centrosomes were added to  
327 interphasic extract or to the MII-arrested extract containing rhodamine-labeled tubulin in the presence  
328 or the absence of GFP-PLK4 (1  $\mu$ M). These extracts are incubated for 30 min at 16°C and visualized by  
329 confocal microscope. Prism (version 5.0c; GraphPad) was used for statistical analysis and plotting when  
330 was needed.

331

332 **Super resolution of PLK4 in *Xenopus* extracts assay**

333 Structured Illumination Microscopy (SIM) of PLK4-GFP supramolecular assemblies was performed on N-  
334 SIM, Nikon Inc., equipped with Apo TIRF 100x NA 1.49 Plan Apo oil objective, back-illuminated EMCCD  
335 camera (Andor, DU897), and 405, 488, 561 and 640 nm excitation lasers. 100 nm Z sections were  
336 acquired in 3D SIM mode generating 15 images per plane, and reconstructed. XYZ corrections were  
337 applied using the signals of 100 nm multi-spectral fluorescent spheres (Invitrogen) included in the  
338 sample.

339 **Correlative light and electron microscopy**

340 To correlate light and electron microscopy images of PLK4-GFP supramolecular assemblies, *in vitro* PLK4-  
341 GFP self-assembly reaction mixture was overlaid directly to the coverslips mounted in Attofluor Cell  
342 Chambers (Invitrogen; A7816) and kept at 37°. The coverslips contained previously sparsely seeded and  
343 fixed HeLa cells. HeLa cells served as landmarks for subsequent identification of target Plk4-GFP  
344 supramolecular assemblies during trimming, sectioning, and imaging on electron microscope. Plk4-GFP  
345 supramolecular assemblies were fixed in 2.5% glutaraldehyde, and immediately imaged on an inverted  
346 microscope (Eclipse Ti; Nikon, Tokyo, Japan) equipped with a spinning-disk confocal (CSUX Spinning Disk;  
347 Yokogawa Electric Corporation, Tokyo, Japan), back-illuminated 13 µm pixel EMCCD camera (Andor,  
348 DU888), 100x NA 1.42 Plan Apo objective lens with 1.5x magnifying tube lens, and a 2x lens in front of  
349 the confocal head. The position of Plk4-GFP supramolecular assemblies were recorded by acquiring a  
350 stack of 200 nm-thick Z sections in fluorescent mode and then in DIC (using Nikon DS-U3 camera). The  
351 position of the target Plk4-GFP supramolecular assemblies and fiducial cells on the coverslip was marked  
352 by a diamond scribe, as described earlier (Kong and Loncarek, 2015). After fixation, the samples were  
353 washed in PBS for 30 min, pre-stained with osmium tetroxide and uranyl acetate, dehydrated in ethanol,  
354 and then embedded in Embed 812 resin. 80 nm thick serial sections were sectioned, transferred onto the  
355 formvar coated copper slot grids, stained with uranyl acetate and lead citrate, and imaged using a  
356 transmission electron microscope (H-7650; Hitachi, Tokyo, Japan) operating at 80 kV. For the alignment  
357 of serial sections and for image analysis we used Photoshop (Adobe) and Fiji (NIH).

358 **Author Contributions**

359 S.M.G purified the proteins, performed the microtubule assays, the EM and the SIM experiments with  
360 the participation of P.D, E.T., A.L, D.K and J.L. The CLEM experiments were performed by D.K and J.L. S.Z.  
361 performed the aster formation assays in extracts and the supramolecular assembly formation assays  
362 with the participation of B.R.G. and T.H. S.M.G and S.Z wrote the manuscript and made the figures. All  
363 authors read, discussed and approved the manuscript. S.M.G. and M.B.D. conceived the study and were  
364 in charge of overall direction and planning.

365 **Competing interest statement**

366 The authors declare no competing interests.

367 **Acknowledgements**

368 We are thankful to Anna Akhmanova, Raquel Oliveira and Jeffrey B.Woodruff for reading and discussing  
369 the manuscript. S.M.G was funded by an EMBO Long term fellowship ALTF 1088-2009, a Marie curie  
370 Intra-European fellowship (#253373), a FCT post-doc fellowship. The collaboration with J.L. laboratory in  
371 the USA was financed by a Journal of Biologist travel grant. S.Z is funded by ERC grant ERC-COG-683258.  
372 Research in JL lab was supported by the Intramural Research Program of the NIH, National Cancer  
373 Institute, Center for Cancer Research. M.B-D. Laboratory is supported by an ERC grant ERC-COG-683258  
374 and FCT-investigator to MBD.

## 375 References

- 376 **Bahtz, R., Seidler, J., Arnold, M., Haselmann-Weiss, U., Antony, C., Lehmann, W. D. and**  
377 **Hoffmann, I.** (2012). GCP6 is a substrate of Plk4 and required for centriole duplication. *J Cell Sci* **125**, 486-  
378 96.
- 379 **Bettencourt-Dias, M., Rodrigues-Martins, A., Carpenter, L., Riparbelli, M., Lehmann, L., Gatt,**  
380 **M. K., Carmo, N., Balloux, F., Callaini, G. and Glover, D. M.** (2005). SAK/PLK4 is required for centriole  
381 duplication and flagella development. *Curr Biol* **15**, 2199-207.
- 382 **Bishop, A. C., Ubersax, J. A., Petsch, D. T., Matheos, D. P., Gray, N. S., Blethrow, J., Shimizu, E.,**  
383 **Tsien, J. Z., Schultz, P. G., Rose, M. D. et al.** (2000). A chemical switch for inhibitor-sensitive alleles of any  
384 protein kinase. *Nature* **407**, 395-401.
- 385 **Brandt, R. and Lee, G.** (1994). Orientation, assembly, and stability of microtubule bundles  
386 induced by a fragment of tau protein. *Cell Motil Cytoskeleton* **28**, 143-54.
- 387 **Bury, L., Coelho, P. A., Simeone, A., Ferries, S., Eysers, C. E., Eysers, P. A., Zernicka-Goetz, M. and**  
388 **Glover, D. M.** (2017). Plk4 and Aurora A cooperate in the initiation of acentriolar spindle assembly in  
389 mammalian oocytes. *J Cell Biol* **216**, 3571-3590.
- 390 **Coelho, P. A., Bury, L., Sharif, B., Riparbelli, M. G., Fu, J., Callaini, G., Glover, D. M. and**  
391 **Zernicka-Goetz, M.** (2013). Spindle formation in the mouse embryo requires Plk4 in the absence of  
392 centrioles. *Dev Cell* **27**, 586-97.
- 393 **Compton, D. A.** (1998). Focusing on spindle poles. *J Cell Sci* **111 ( Pt 11)**, 1477-81.
- 394 **Eckerdt, F., Yamamoto, T. M., Lewellyn, A. L. and Maller, J. L.** (2011). Identification of a polo-like  
395 kinase 4-dependent pathway for de novo centriole formation. *Curr Biol* **21**, 428-32.
- 396 **Gaglio, T., Dionne, M. A. and Compton, D. A.** (1997). Mitotic spindle poles are organized by  
397 structural and motor proteins in addition to centrosomes. *J Cell Biol* **138**, 1055-66.
- 398 **Gaglio, T., Saredi, A., Bingham, J. B., Hasbani, M. J., Gill, S. R., Schroer, T. A. and Compton, D. A.**  
399 (1996). Opposing motor activities are required for the organization of the mammalian mitotic spindle  
400 pole. *J Cell Biol* **135**, 399-414.
- 401 **Habedanck, R., Stierhof, Y. D., Wilkinson, C. J. and Nigg, E. A.** (2005). The Polo kinase Plk4  
402 functions in centriole duplication. *Nat Cell Biol* **7**, 1140-6.
- 403 **Honnappa, S., Gouveia, S. M., Weisbrich, A., Damberger, F. F., Bhavesh, N. S., Jawhari, H.,**  
404 **Grigoriev, I., van Rijssel, F. J., Buey, R. M., Lawera, A. et al.** (2009). An EB1-binding motif acts as a  
405 microtubule tip localization signal. *Cell* **138**, 366-76.
- 406 **Jana, S. C., Marteil, G. and Bettencourt-Dias, M.** (2014). Mapping molecules to structure:  
407 unveiling secrets of centriole and cilia assembly with near-atomic resolution. *Curr Opin Cell Biol* **26**, 96-  
408 106.
- 409 **Kong, D. and Loncarek, J.** (2015). Correlative light and electron microscopy analysis of the  
410 centrosome: A step-by-step protocol. *Methods Cell Biol* **129**, 1-18.
- 411 **Lawo, S., Hasegan, M., Gupta, G. D. and Pelletier, L.** (2012). Subdiffraction imaging of  
412 centrosomes reveals higher-order organizational features of pericentriolar material. *Nat Cell Biol* **14**,  
413 1148-58.
- 414 **Loncarek, J. and Bettencourt-Dias, M.** (2017). Building the right centriole for each cell type. *J Cell*  
415 *Biol.*
- 416 **Lopes, C. A., Jana, S. C., Cunha-Ferreira, I., Zitouni, S., Bento, I., Duarte, P., Gilberto, S., Freixo,**  
417 **F., Guerrero, A., Francia, M. et al.** (2015). PLK4 trans-Autoactivation Controls Centriole Biogenesis in  
418 Space. *Dev Cell* **35**, 222-35.
- 419 **Lorca, T., Bernis, C., Vigneron, S., Burgess, A., Brioude, E., Labbe, J. C. and Castro, A.** (2010).  
420 Constant regulation of both the MPF amplification loop and the Greatwall-PP2A pathway is required for  
421 metaphase II arrest and correct entry into the first embryonic cell cycle. *J Cell Sci* **123**, 2281-91.

422 **Martin, C. A., Ahmad, I., Klingseisen, A., Hussain, M. S., Bicknell, L. S., Leitch, A., Nurnberg, G.,**  
423 **Toliat, M. R., Murray, J. E., Hunt, D. et al.** (2014). Mutations in PLK4, encoding a master regulator of  
424 centriole biogenesis, cause microcephaly, growth failure and retinopathy. *Nat Genet* **46**, 1283-1292.  
425 **Mitchison, T. J.** (1992). Self-organization of polymer-motor systems in the cytoskeleton. *Philos*  
426 *Trans R Soc Lond B Biol Sci* **336**, 99-106.  
427 **Moyer, T. C., Clutario, K. M., Lambrus, B. G., Daggubati, V. and Holland, A. J.** (2015). Binding of  
428 STIL to Plk4 activates kinase activity to promote centriole assembly. *J Cell Biol* **209**, 863-78.  
429 **O'Toole, E., Greenan, G., Lange, K. I., Srayko, M. and Muller-Reichert, T.** (2012). The role of  
430 gamma-tubulin in centrosomal microtubule organization. *PLoS One* **7**, e29795.  
431 **Oriolo, A. S., Wald, F. A., Canessa, G. and Salas, P. J.** (2007). GCP6 binds to intermediate  
432 filaments: a novel function of keratins in the organization of microtubules in epithelial cells. *Mol Biol Cell*  
433 **18**, 781-94.  
434 **Paz, J. and Luders, J.** (2017). Microtubule-Organizing Centers: Towards a Minimal Parts List.  
435 *Trends Cell Biol.*  
436 **Popov, A. V., Severin, F. and Karsenti, E.** (2002). XMAP215 is required for the microtubule-  
437 nucleating activity of centrosomes. *Curr Biol* **12**, 1326-30.  
438 **Rodrigues-Martins, A., Riparelli, M., Callaini, G., Glover, D. M. and Bettencourt-Dias, M.**  
439 (2007). Revisiting the role of the mother centriole in centriole biogenesis. *Science* **316**, 1046-50.  
440 **Roostalu, J. and Surrey, T.** (2017). Microtubule nucleation: beyond the template. *Nat Rev Mol*  
441 *Cell Biol* **18**, 702-710.  
442 **Sanchez, A. D. and Feldman, J. L.** (2017). Microtubule-organizing centers: from the centrosome  
443 to non-centrosomal sites. *Curr Opin Cell Biol* **44**, 93-101.  
444 **Sharma, A., Aher, A., Dynes, N. J., Frey, D., Katrukha, E. A., Jaussi, R., Grigoriev, I., Croisier, M.,**  
445 **Kammerer, R. A., Akhmanova, A. et al.** (2016). Centriolar CPAP/SAS-4 Imparts Slow Processive  
446 Microtubule Growth. *Dev Cell* **37**, 362-376.  
447 **Teixido-Travesa, N., Roig, J. and Luders, J.** (2012). The where, when and how of microtubule  
448 nucleation - one ring to rule them all. *J Cell Sci* **125**, 4445-56.  
449 **Umeyama, T., Okabe, S., Kanai, Y. and Hirokawa, N.** (1993). Dynamics of microtubules bundled  
450 by microtubule associated protein 2C (MAP2C). *J Cell Biol* **120**, 451-65.  
451 **Wiese, C. and Zheng, Y.** (1999). Gamma-tubulin complexes and their interaction with  
452 microtubule-organizing centers. *Curr Opin Struct Biol* **9**, 250-9.  
453 **Woodruff, J. B., Ferreira Gomes, B., Widlund, P. O., Mahamid, J., Honigmann, A. and Hyman, A.**  
454 **A.** (2017). The Centrosome Is a Selective Condensate that Nucleates Microtubules by Concentrating  
455 Tubulin. *Cell* **169**, 1066-1077 e10.  
456 **Woodruff, J. B. and Hyman, A. A.** (2015). Method: In vitro analysis of pericentriolar material  
457 assembly. *Methods Cell Biol* **129**, 369-82.  
458 **Zitouni, S., Francia, M. E., Leal, F., Montenegro Gouveia, S., Nabais, C., Duarte, P., Gilberto, S.,**  
459 **Brito, D., Moyer, T., Kandels-Lewis, S. et al.** (2016). CDK1 Prevents Unscheduled PLK4-STIL Complex  
460 Assembly in Centriole Biogenesis. *Curr Biol* **26**, 1127-37.  
461



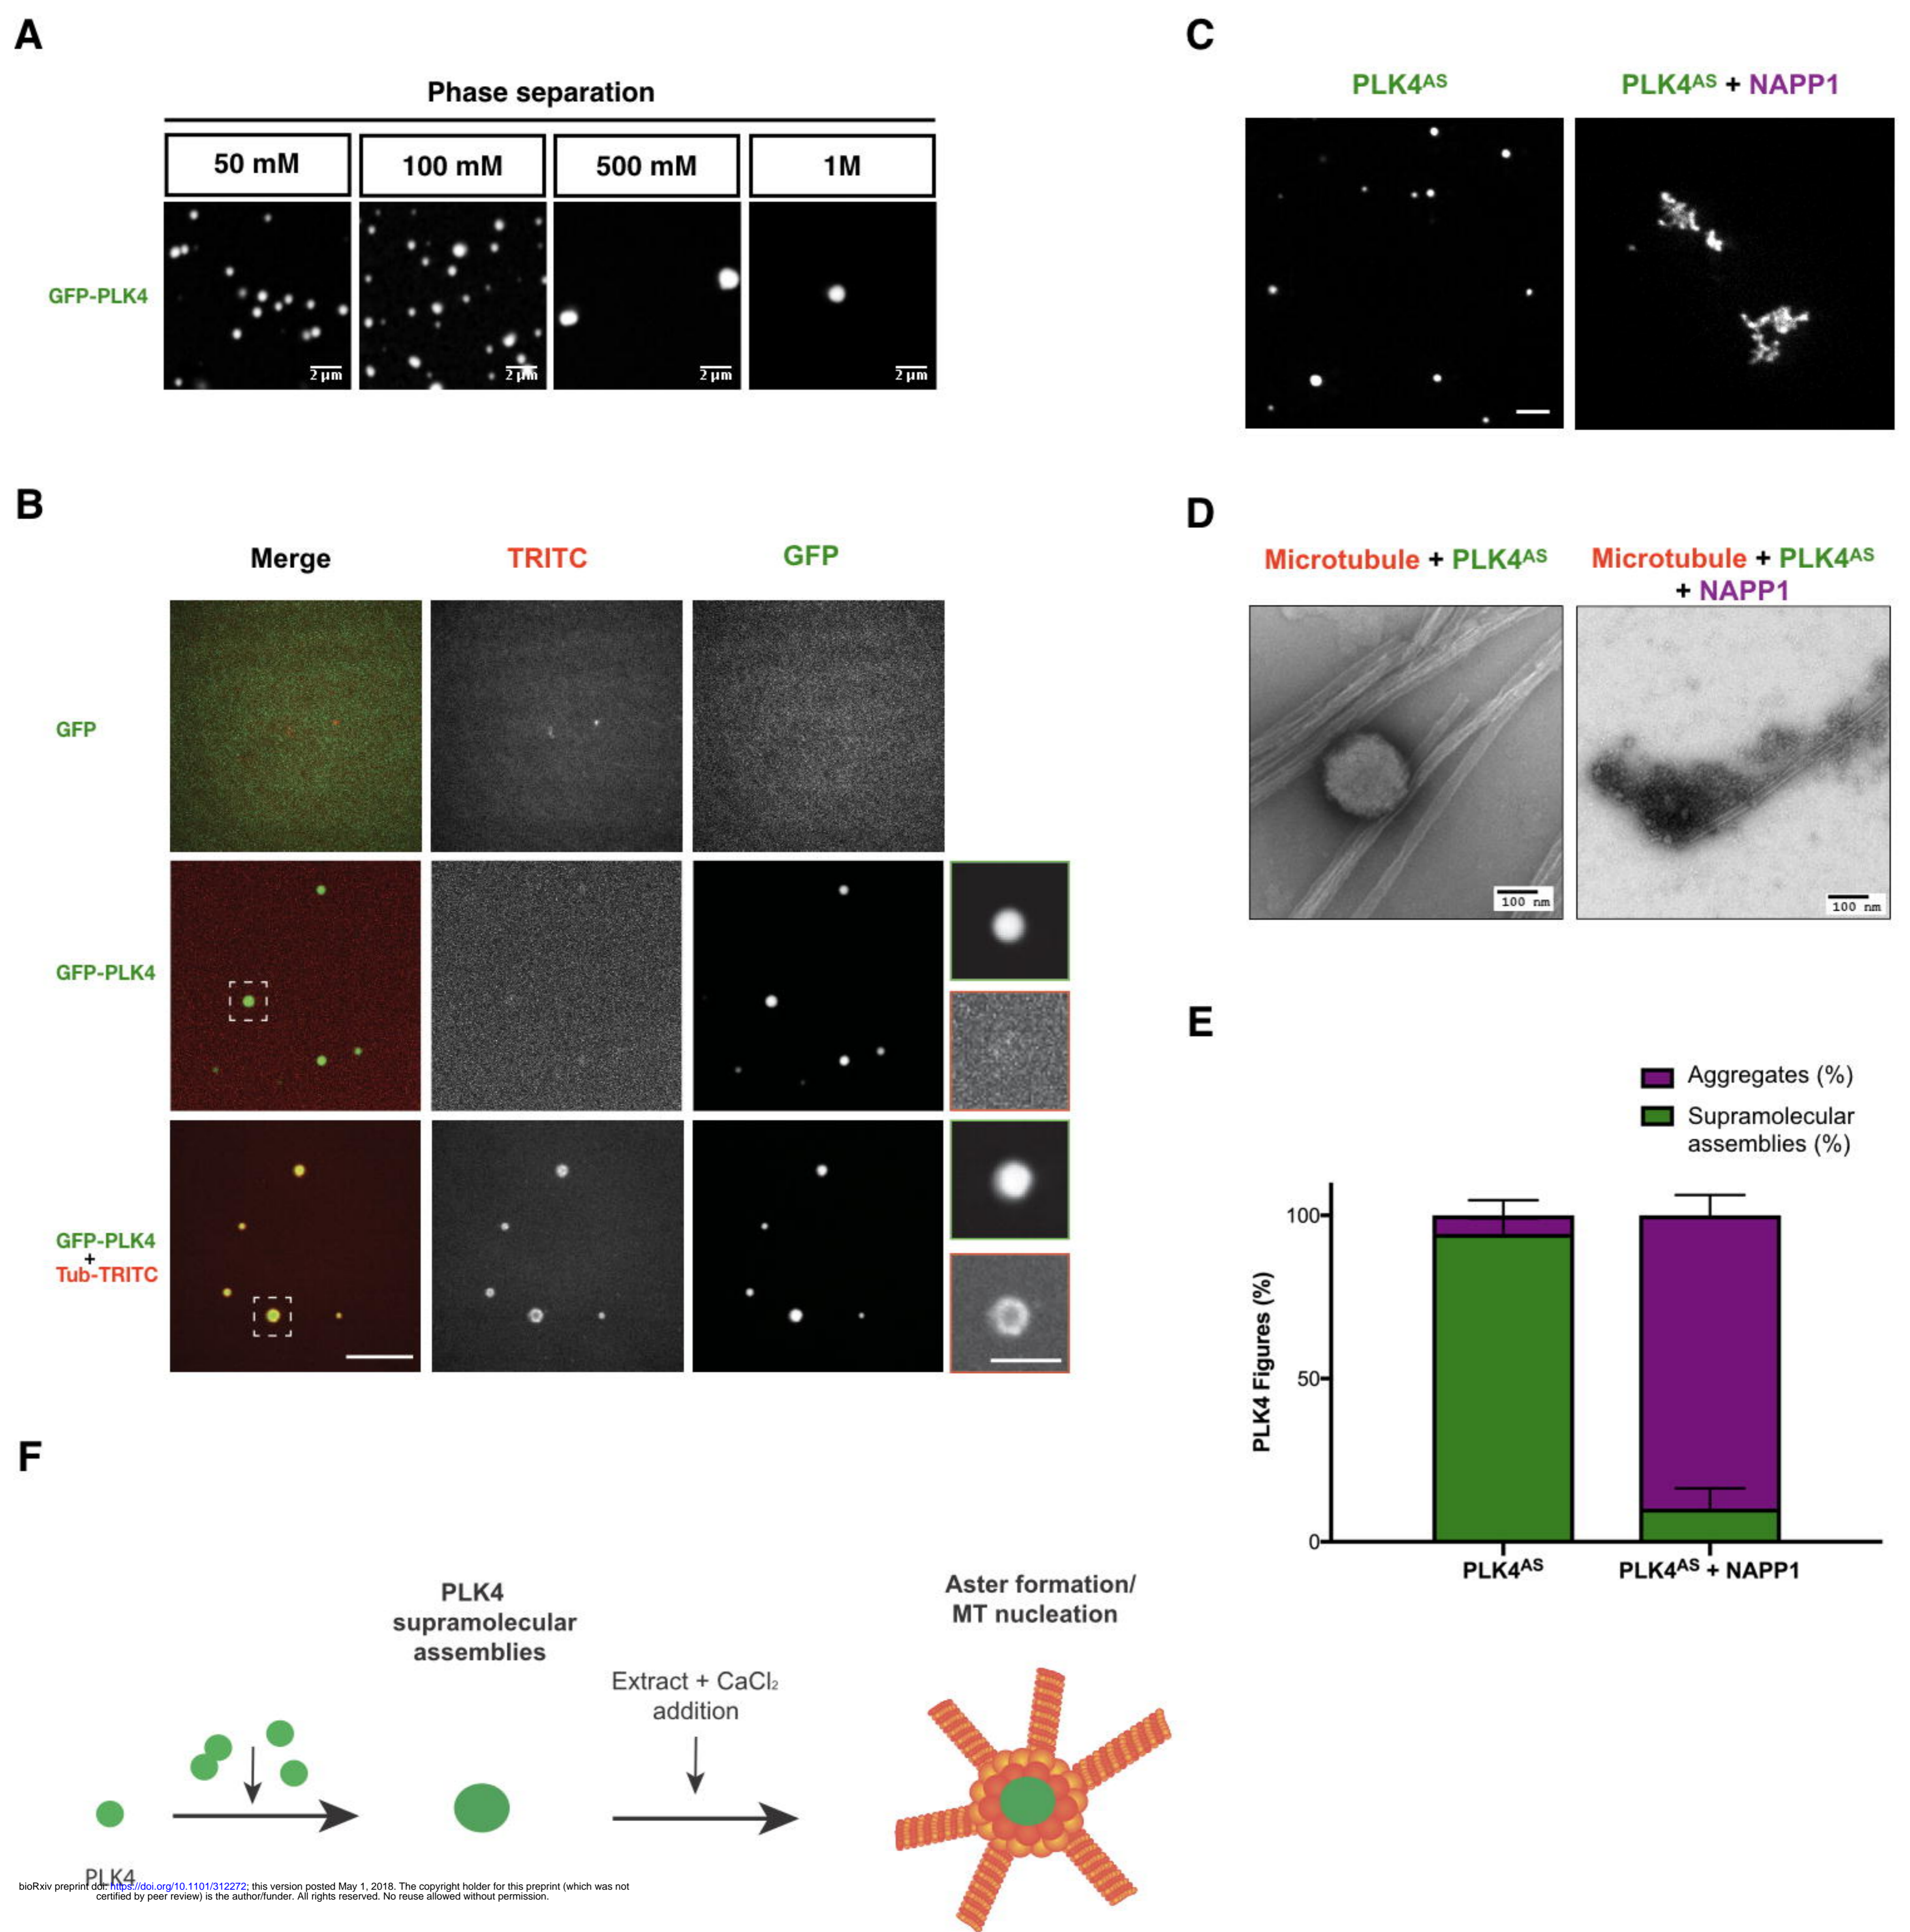

**Figure 1. PLK4 self assembles into supramolecular assemblies that concentrate tubulin *in vitro* in a kinase activity dependent manner.**

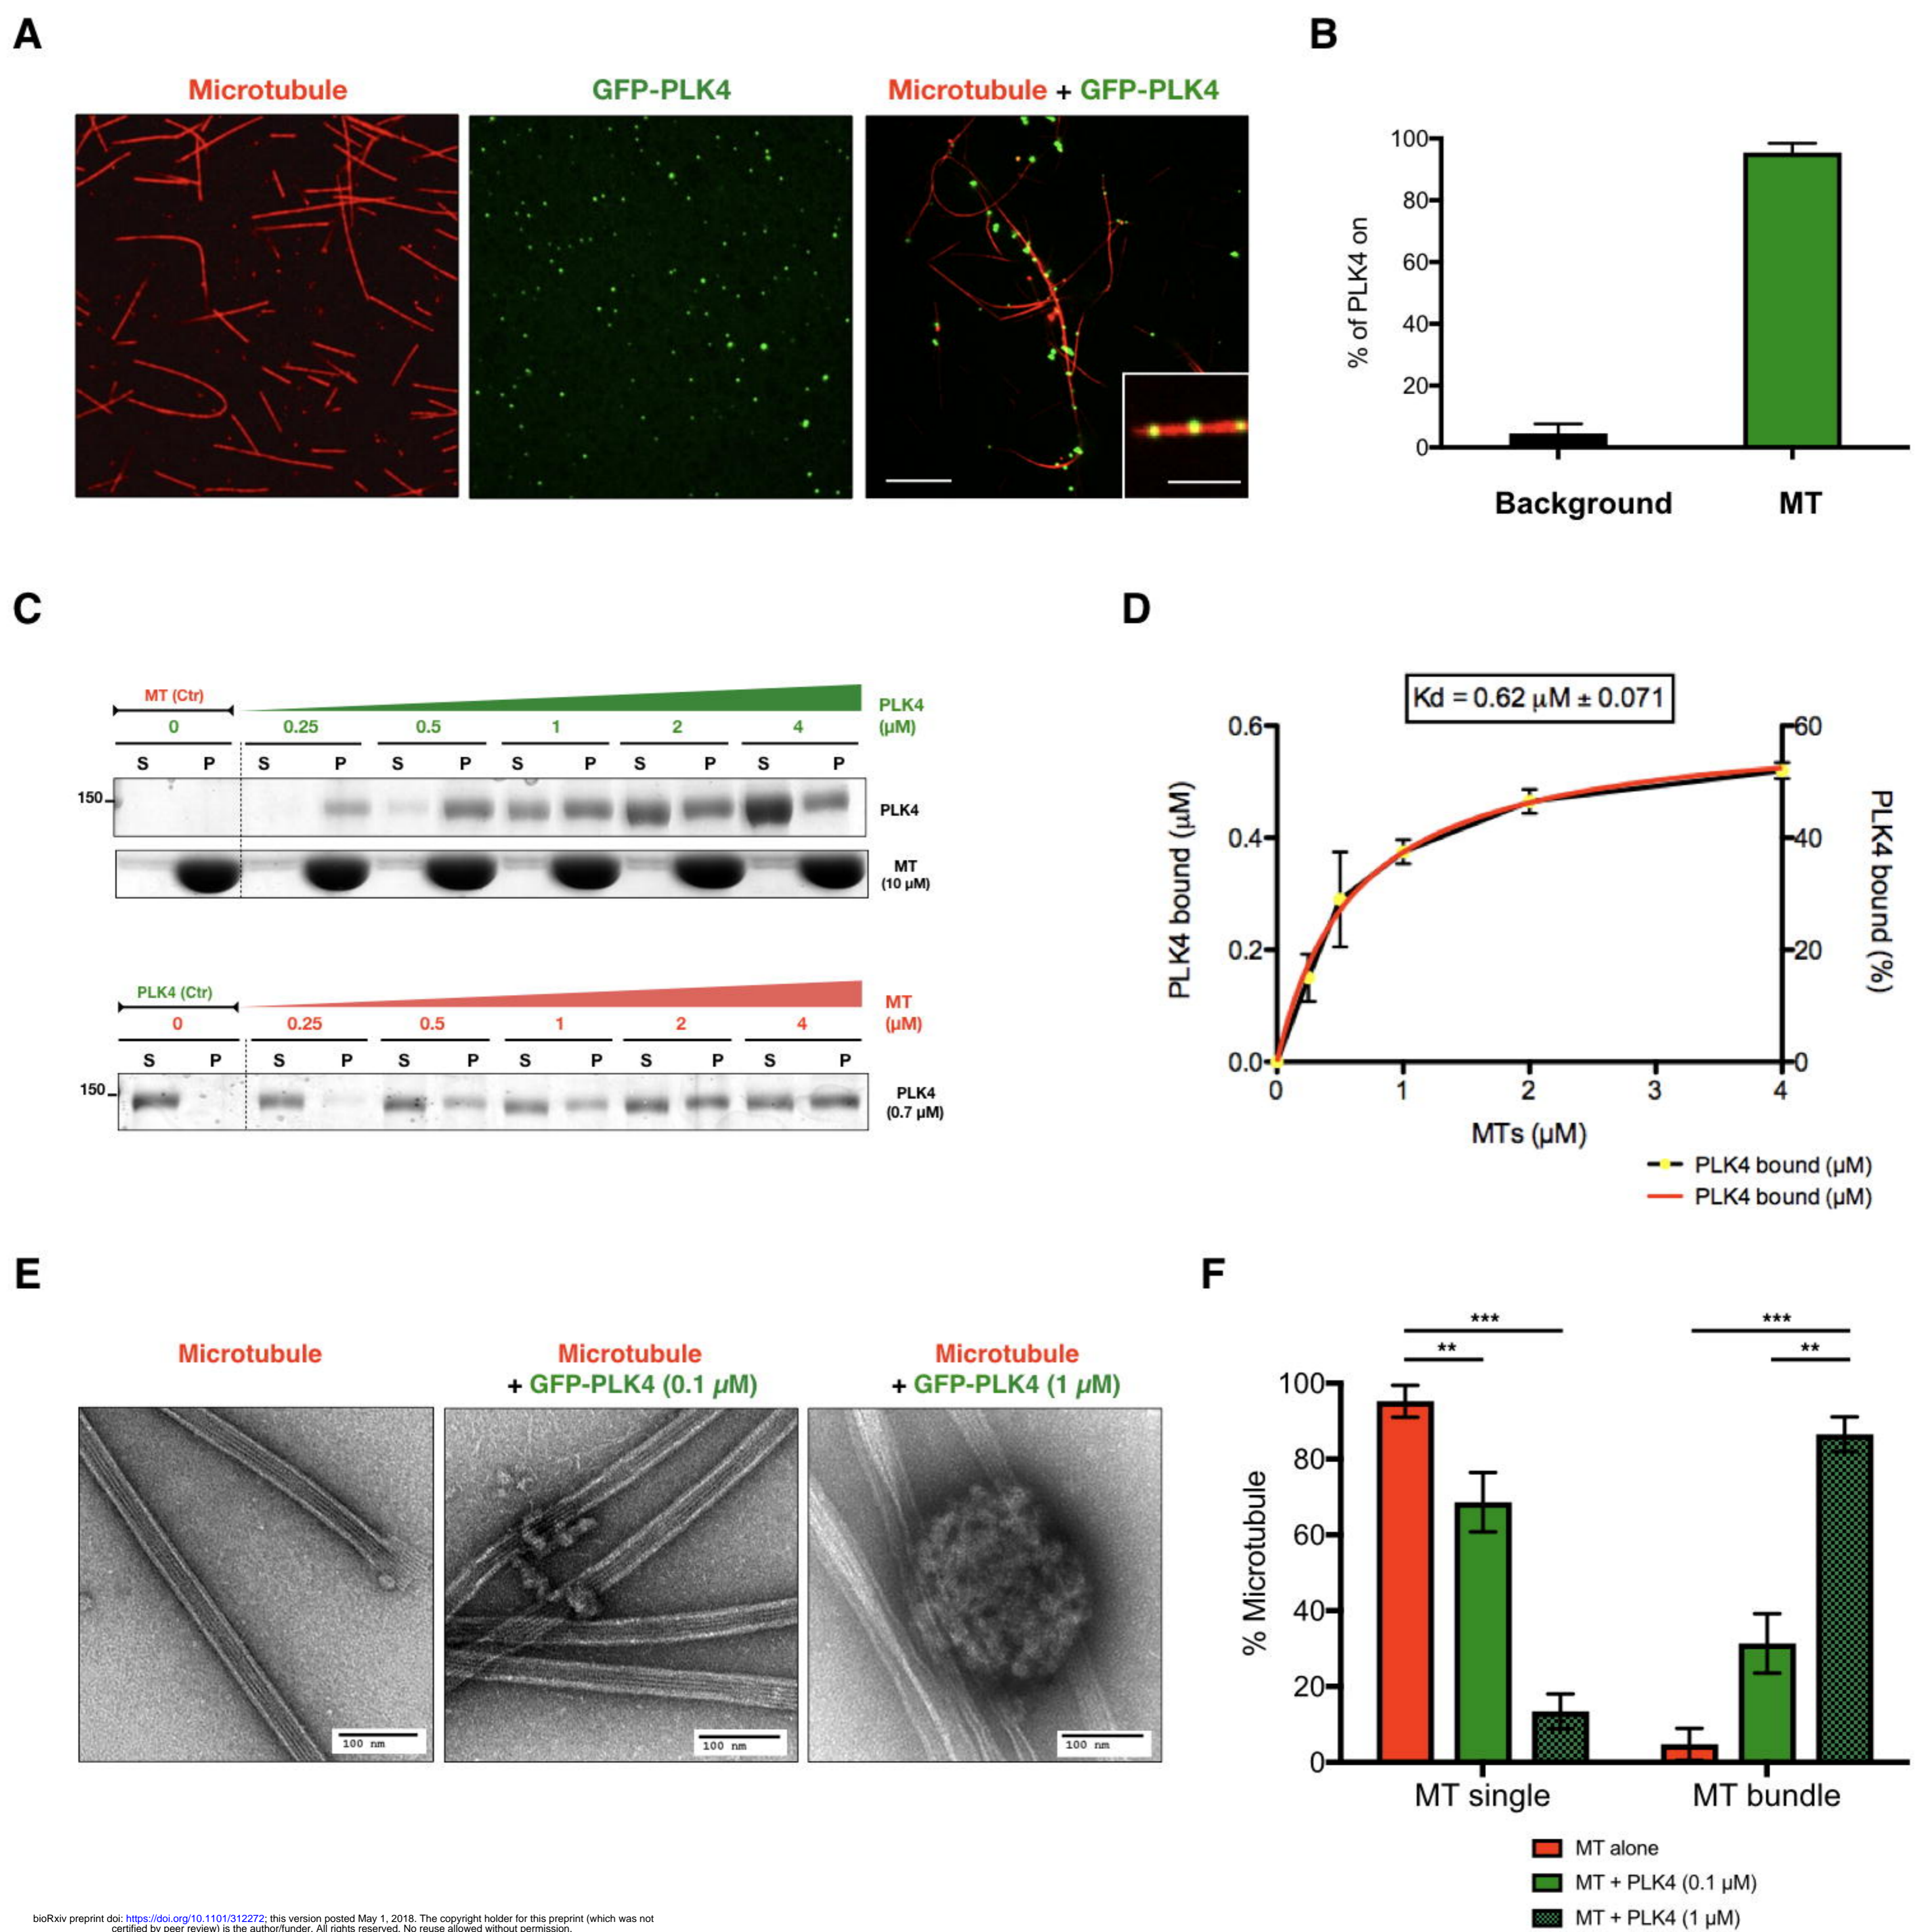

**Figure 2. PLK4 is a microtubule associated protein that promotes microtubule bundling *in vitro*.**

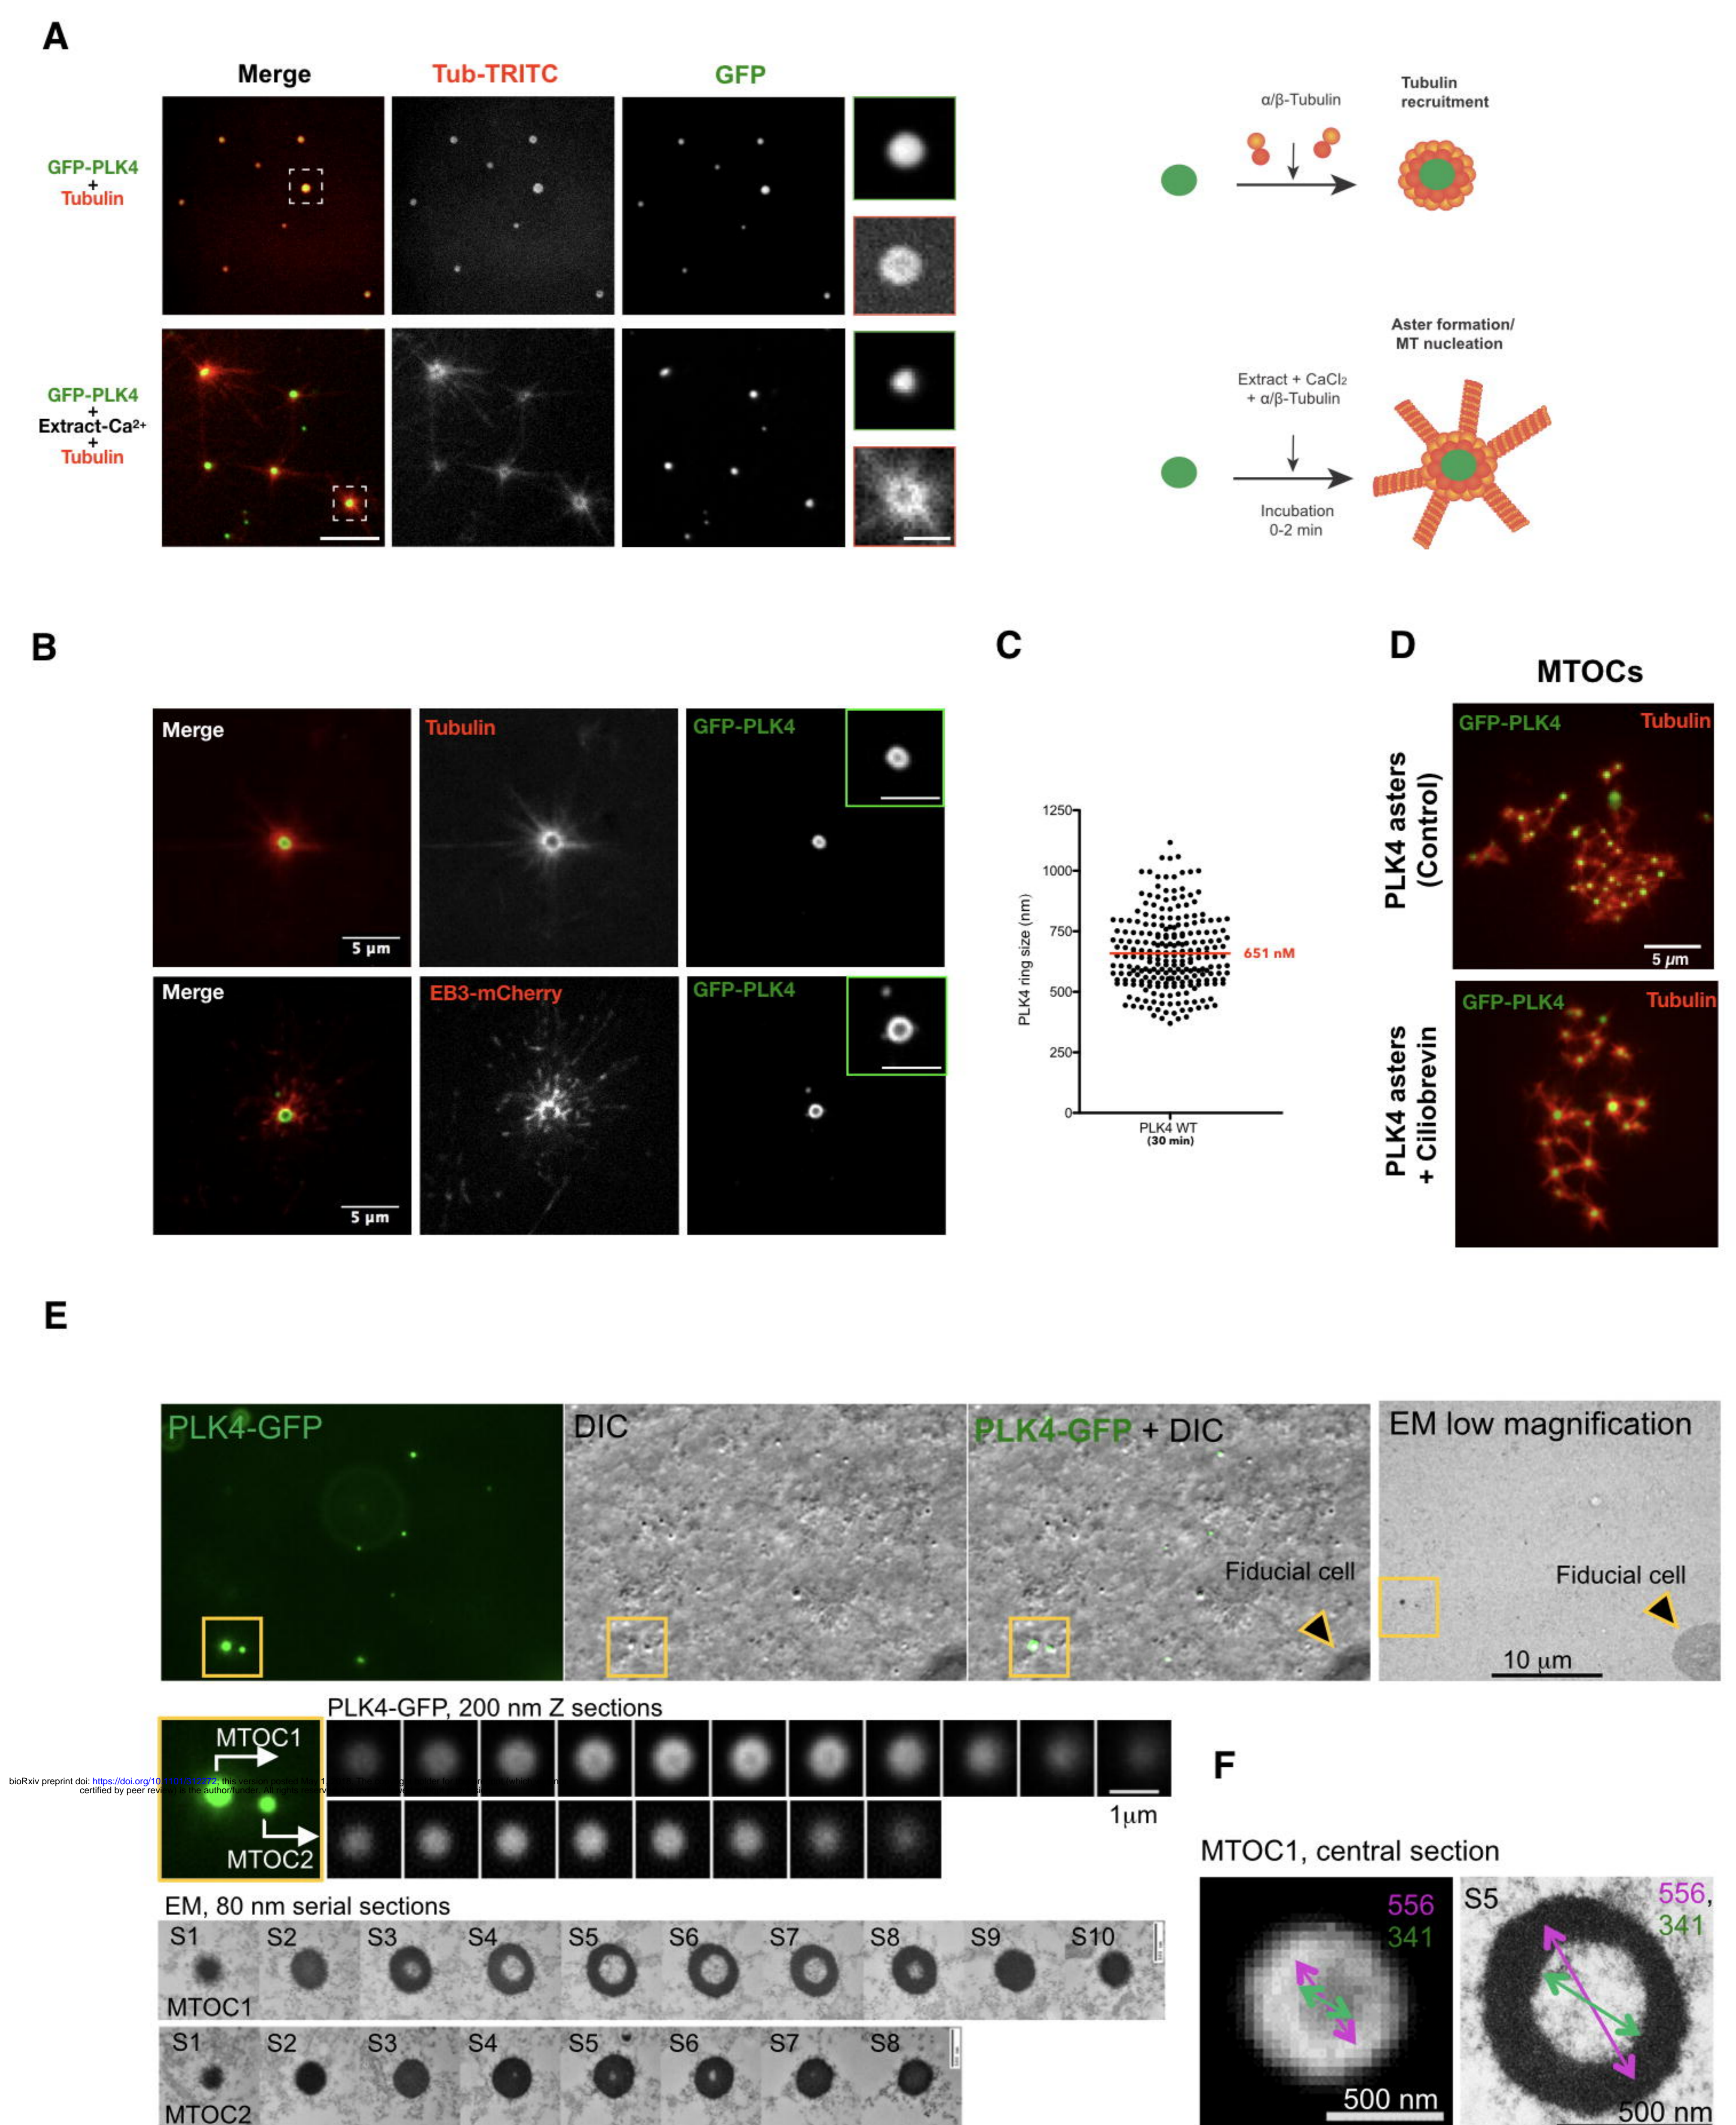

**Figure 3. PLK4 supramolecular assemblies form *de novo* microtubule MTOCs in *Xenopus* extracts that are independent of dynein, mimicking centrosomes *in vivo*.**

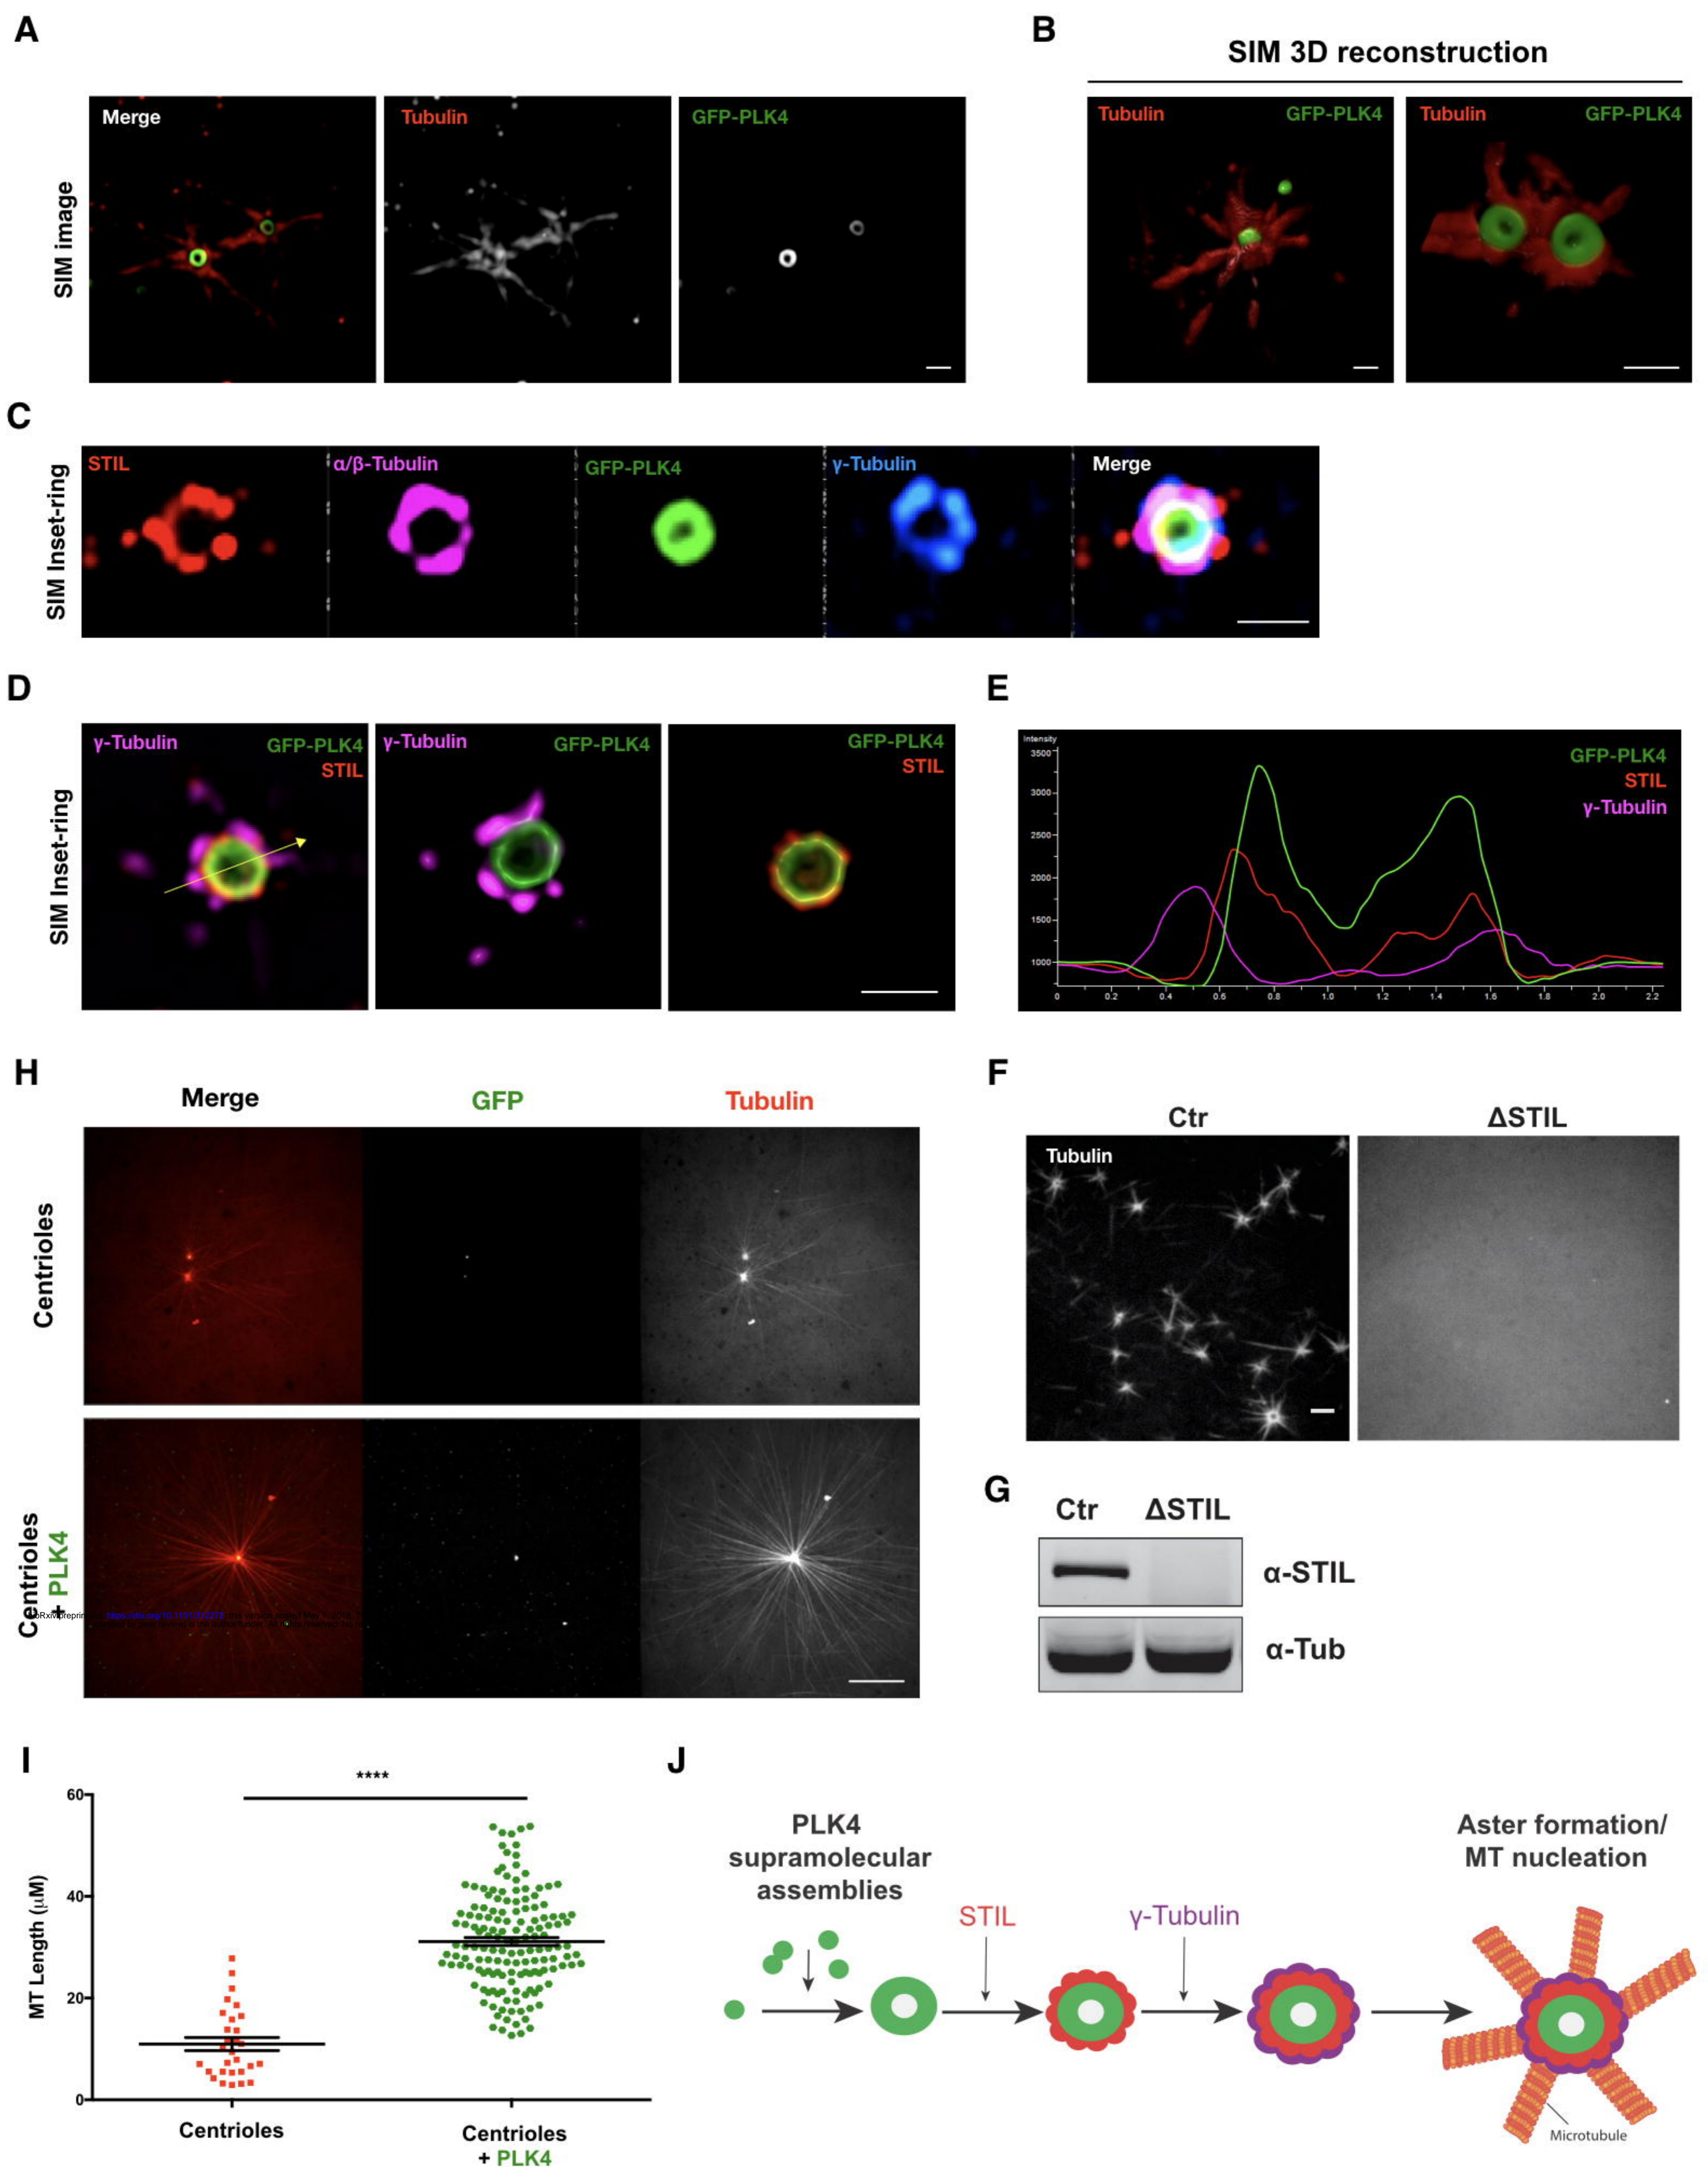

**Figure 4. PLK4 supramolecular assemblies recruit STIL and  $\gamma$ -tubulin in *Xenopus* extracts and PLK4 enhances centrosomal MT nucleation.**
